# Supplementary material for: Intestinal Transcriptome Analysis Reveals Enrichment of Genes Associated with Immune and Lipid Mechanisms, Favoring Soybean Meal Tolerance in High-Growth Zebrafish (Danio Rerio)
Source: MDPI journal article supplement (doi:10.3390/genes12050700), 2021-05-08
Supplement: s1 [file s1]

**Table 4.** Histological variables measured in the middle intestines of LG-vs.HG-50SBM+2SPN and 100FM fish.

\*p-value <0.05; \*\*p-value<0.01; \*\*\* p-value<0.001; \*\*\*\* p-value <0.0001

| Treatments Groups        | Histological variables measured in middle intestine |                 |                 |                    |                        |                |
|--------------------------|-----------------------------------------------------|-----------------|-----------------|--------------------|------------------------|----------------|
|                          | Fold height                                         | Fold base width | Fold apex width | Fold cho-rion area | Number of Goblet cells | Number of IELs |
| LG-50SBM+2SPN            | 113±40                                              | 50±12           | 44±9            | 477±351,           | 8±6                    | 1±1            |
| HG-50SBM+2SPN            | 151±33                                              | 64±20           | 48±10           | 1100±609           | 9±4                    | 4±3            |
| 100FM                    | 152±46                                              | 60±15           | 55±15           | 949±614            | 9±7                    | 4±2            |
| Significance             |                                                     |                 |                 |                    |                        |                |
| LG-vs.-HG-50SBM+2SPN     | 0.0037**                                            | 0.0419*         | 0.9999          | 0.0006***          | 0.9999                 | 0.0001****     |
| LG-50SBM+2SPN vs. 100 FM | 0.0351*                                             | 0.1023          | 0.0356*         | 0.0090**           | 0.2051                 | 0.0001****     |
| HG-50SBM+2SPN vs. 100FM  | 0.9999                                              | 0.9999          | 0.3290          | 0.9999             | 0.7209                 | 0.9999         |

**Table S5.** Histological variables measured in the posterior intestines of LG-vs. HG-50SBM+2SPN and 100FM fish.

| Treatments Groups        | Histological variables measured in posterior intestine |                 |                 |                    |                         |                |
|--------------------------|--------------------------------------------------------|-----------------|-----------------|--------------------|-------------------------|----------------|
|                          | Fold height                                            | Fold base width | Fold apex width | Fold cho-rion area | Number of Gob-let cells | Number of IELs |
| LG -50SBM+2SPN           | 115±19                                                 | 57±18           | 50±14           | 470±223            | 6±7                     | 1±2            |
| HG -50SBM+2SPN           | 122±23                                                 | 59±21           | 48±18           | 679±395            | 6±5                     | 3±2            |
| 100FM                    | 154±30                                                 | 69±18           | 55±17           | 896±549            | 9±4                     | 5±4            |
| Significance             |                                                        |                 |                 |                    |                         |                |
| LG-vs.-HG-50SBM+2SPN     | 0.9999                                                 | 0.9999          | 0.9999          | 0.2885             | 0.9999                  | 0.0385         |
| LG-50SBM+2SPN vs. 100 FM | 0.0006***                                              | 0.1180          | 0.9999          | 0.0085**           | 0.1783                  | 0.0005***      |
| HG-50SBM+2SPN vs. 100FM  | 0.0059**                                               | 0.2227          | 0.3017          | 0.2610             | 0.3199                  | 0.6198         |

\*\*p-value<0.01; \*\*\* p-value<0.001
